# Supplementary material for: Unveiling the capabilities of vision transformers in sperm morphology analysis: a comparative evaluation
Source: PeerJ Comput Sci. 2025 Sep 10;11:e3173. doi: 10.7717/peerj-cs.3173 (PMC12453802; doi:10.7717/peerj-cs.3173)
Supplement: Supplemental Information 4 [file peerj-cs-11-3173-s004.xlsx]

## Sheet: Sheet1
Training Times of CNN-, Transformer-, and Hybrid-Based Models on 10-x SMIDS and 40-x HuSHeM
Architecture	Model	Params (M)	SMIDS10x - 1 Epoch (min)	SMIDS10x - Total Time (min)	HuSHeM40x - 1 Epoch (min)	HuSHeM40x - Total Time (min)
CNN Based Networks	Custom CNN	1.3	0:00:33	2:17:30	0:00:09	0:37:30
	Eff-V2-S	22	0:04:04	16:56:40	0:00:56	3:53:20
	Eff-V2-L	61	0:07:10	29:51:40	0:02:03	8:32:30
Transformer Based Networks	BEiT-B	86	0:03:15	13:32:30	0:01:40	6:56:40
	Swin-V2-L	197	0:06:32	27:13:20	0:01:50	7:38:20
	Swin-V2-T	28	0:01:02	4:18:20	0:00:22	1:31:40
Hybrid Based Networks	Custom CNN + BEiT-B	87.3	0:03:43	15:29:10	0:01:56	8:03:20
	Eff-V2-S + Beit-B	108	0:11:35	48:15:50	0:02:11	9:05:50
	Eff-V2-S + Swin-V2-L	219	0:14:53	62:00:50	0:02:41	11:10:50
	CoAtNet-0	27	0:02:07	8:49:10	0:00:44	3:03:20
	CoAtNet-1	50	0:03:58	16:31:40	0:01:01	4:14:10
	TOTAL		0:58:52	245:16:40	0:15:33	64:47:30
