# Supplementary material for: Unveiling the capabilities of vision transformers in sperm morphology analysis: a comparative evaluation
Source: PeerJ Comput Sci. 2025 Sep 10;11:e3173. doi: 10.7717/peerj-cs.3173 (PMC12453802; doi:10.7717/peerj-cs.3173)
Supplement: Supplemental Information 5 [file peerj-cs-11-3173-s005.xlsx]

## Sheet: Sheet1
Experimental Setup Specifications
Category	Details
Operating System	Ubuntu 22.04 LTS
CPU	AMD Epyc 7313, 3.0GHz 16 Core /32 Thread
GPU	NVIDIA GeForce RTX 4090 24 GB GDDR6X x 2
RAM	Samsung 128 GB DDR4 3200 MHz
Python Version	3.10
Libraries and Versions	pytorch 2.4.0, transformers 4.10.0, datasets 1.11.0, scikit-learn 0.24.2, matplotlib 3.4.3, seaborn 0.11.2
Training Framework	Huggingface Transformers and Datasets
