# Supplementary material for: Unveiling the capabilities of vision transformers in sperm morphology analysis: a comparative evaluation
Source: PeerJ Comput Sci. 2025 Sep 10;11:e3173. doi: 10.7717/peerj-cs.3173 (PMC12453802; doi:10.7717/peerj-cs.3173)
Supplement: Supplemental Information 6 [file peerj-cs-11-3173-s006.xlsx]

## Sheet: Sheet1
Tested Hyper-parameter List
Parameter	HuSHeM Configuration	SMIDS Configuration
Optimizer	Adamax, SGD, RMSProp
Augment Scale	1× (Original), 5×, 10×, 40×	1× (Original), 3×, 5×, 10×
Learning Rate	10^-3 - 10^-4 - 10^-5
Loss Function	Categorical Crossentropy
Number Of Epochs	50
